# Supplementary material for: In situ synthesis of europium oxide (Eu2O3) nanoparticles in heteroatom doped carbon nanofibers for boosting the cycling stability of supercapacitors
Source: Royal Society of Chemistry journal article supplement (doi:10.1039/d4dt01297f), 2024-01-01
Supplement: d4dt01297f1.pdf [file d4dt01297f1.pdf]

# **In-situ synthesis of europium oxide (Eu<sub>2</sub>O<sub>3</sub>) nanoparticles in heteroatom doped carbon nanofibers for boosting the cycle stability of the supercapacitors**

**Hamide Aydın <sup>a\*</sup>, Burcu Üstün <sup>b</sup>, Ümran Kurtan <sup>c</sup>, Utkan Şahintürk <sup>d</sup>,  
Selcan Karakuş <sup>a</sup>**

<sup>a</sup> Department of Chemistry, İstanbul University-Cerrahpaşa, 34500, İstanbul/Türkiye

<sup>b</sup> Department of Chemical Engineering, İstanbul University-Cerrahpaşa,  
34500, İstanbul/Türkiye

<sup>c</sup> Department of Materials and Materials Processing Technologies, Vocational School of  
Technical Sciences, 34500, İstanbul/Türkiye

<sup>d</sup> Department of Mechanical and Metal Technologies, İstanbul University-Cerrahpaşa, 34500,  
İstanbul/Türkiye

## **1. Experimental section**

### **1.1. Materials**

Polyacrylonitrile (PAN, Mw=150 000) and Europium (III) nitrate pentahydrate (Eu(NO<sub>3</sub>)<sub>3</sub>·5H<sub>2</sub>O) were obtained from Sigma Aldrich. Dimethylformamide (DMF) and Thiourea were purchased from Merck and Labshop41, respectively. All the analytical grade chemicals were used as received without further purification.

## **1.2. Structural characterization**

X-ray powder diffractometer (XRD, PANalytical Empyrean). Samples were also characterized by Raman spectroscopy by employing WITech Alpha 300R with a wavelength of 532 nm. The constituent structures of the materials were characterized and analyzed by an x-ray electron spectrometer (XPS, a Thermo Scientific K-Alpha). The surface morphological structure of the sample materials was visualized using a scanning electron microscope (SEM, Zeiss Sigma 300) with its own energy spectrometer (EDS), a transmission electron microscope (TEM, Hitachi HT7700). N<sub>2</sub> adsorption/desorption isotherms were recorded at 77K (Micrometrics, TriStar II Surface Area and Porosity Analyzer), and the specific surface areas were calculated according to the Brunauer–Emmett–Teller (BET) method.

## **1.3. Symmetric supercapacitor (SSC) cell assembly and electrochemical measurements conducted in a two-electrode system**

Electrochemical measurement was performed using GAMRY Reference 3000 for two-electrode systems. The electrochemical performances of the CNFs were evaluated by cyclic voltammetry (CV) and galvanic charge-discharge (GCD) techniques.

SC cell was assembled by compressing CR2032 button-type cells with an electrical battery closing machine. Two pieces of CNF electrodes (10 mm diameter) and a piece of Whatman separator (19 mm diameter) were cut. Then, they were placed into the button-type CR2032 cell as electrode/separator/electrode in 1 M H<sub>2</sub>SO<sub>4</sub>, respectively. The CV curves were obtained in the potential range of 0-1.2 V at several sweeping rates. A BST8-MA 8-channel battery analyzer (0.02-10 mA, 5V, MTI Corp.) device was used for GCD tests. The GCD tests were recorded in the potential range of 0-1.2 V at different current densities. 10 000 charge-discharge cycles were performed on SC cells, and the capacity, the specific energy, the

specific power, and the cycle stability of the supercapacitor cells were calculated with the Eqn 2 and 3. The electrochemical impedance spectroscopy (EIS) analysis was implemented in the frequency range of 0.01 Hz-100 kHz. The specific capacitance for the single electrode ( $C_{sp}$ ) was calculated via Eq. (2).

$$C_{sp} = 2I \times \Delta t / (M \Delta V) \quad (1)$$

where  $I$  is the discharge current,  $\Delta t$  is the discharge time,  $M$  is a mass of the active materials of working electrodes, and  $\Delta V$  is the voltage range.

$$E = C_{sp} \Delta V^2 / (8 \times 3.6) \quad (2)$$

$$P = 3600 \times E / \Delta t \quad (3)$$

where  $P$  and  $E$  are the specific power (W/kg) and specific energy (Wh/kg), respectively.

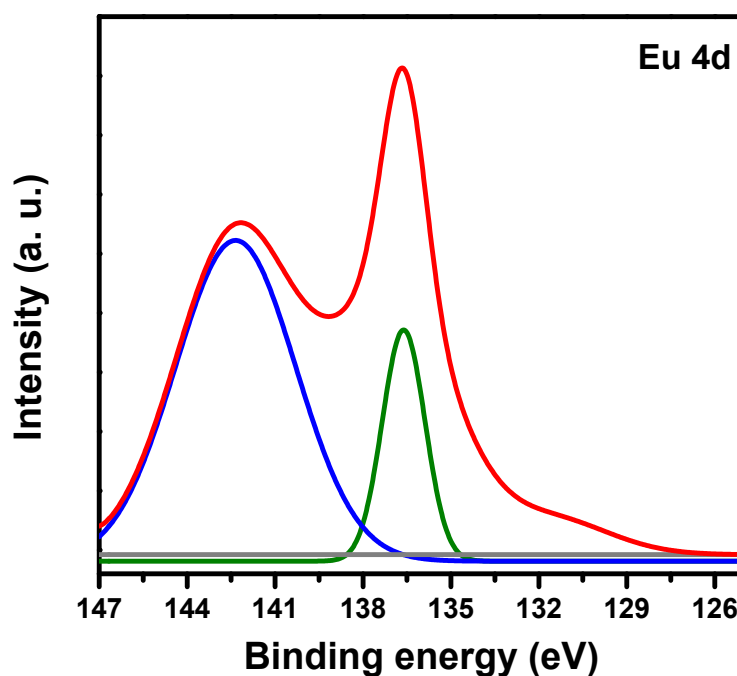

Fig. S1. XPS spectra of Eu 4d of the CNF/Eu<sub>2</sub>O<sub>3</sub>-1.

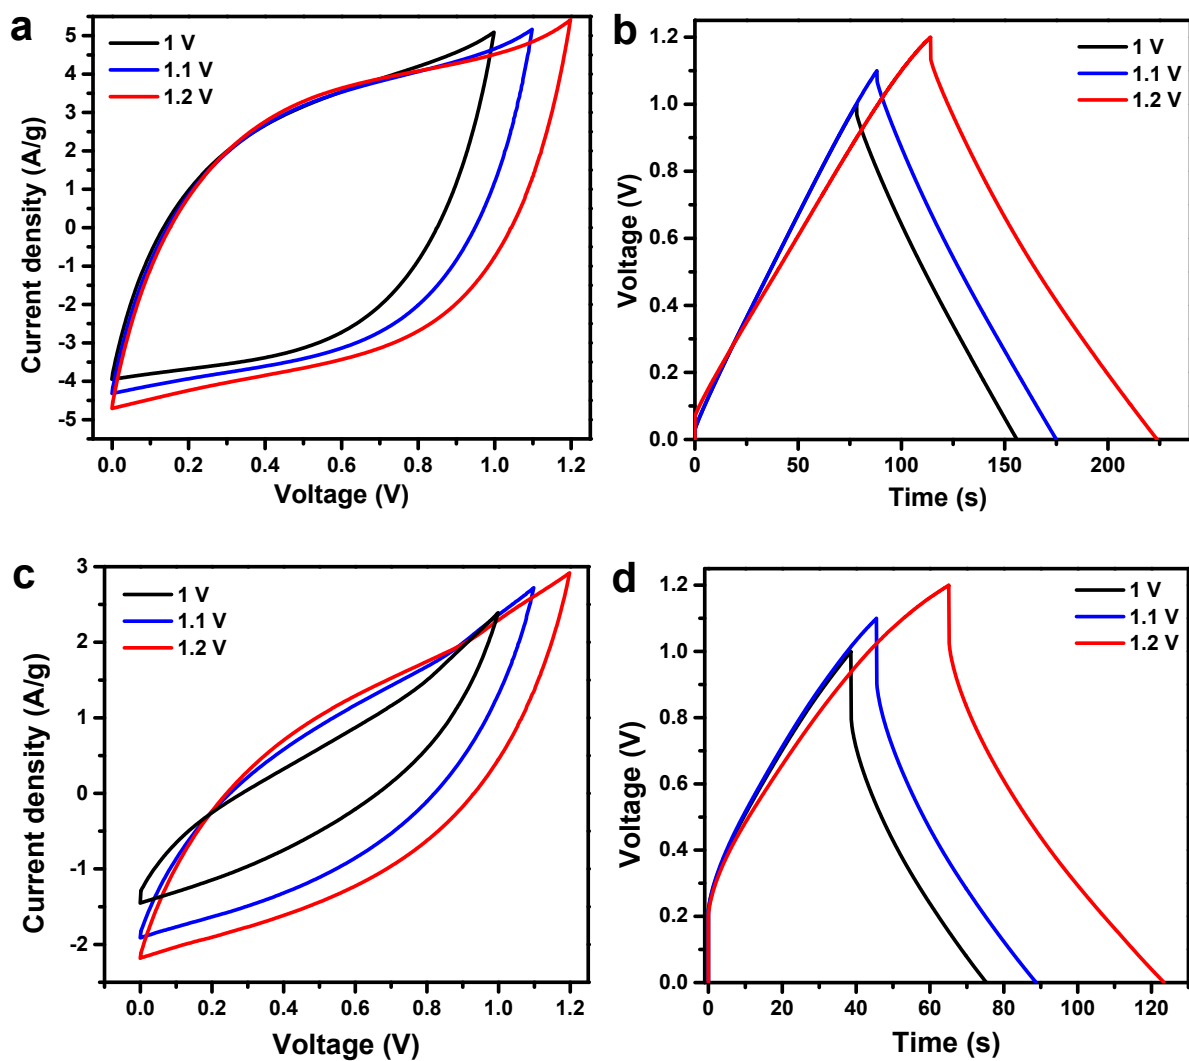

**Fig. S2.** (a, c) CV curves at 50 mV/s and (b, d) GCD curves at 1 A/g of the CNF/Eu<sub>2</sub>O<sub>3</sub>-1 and CNF/Eu<sub>2</sub>O<sub>3</sub>-2 for different voltages, respectively,

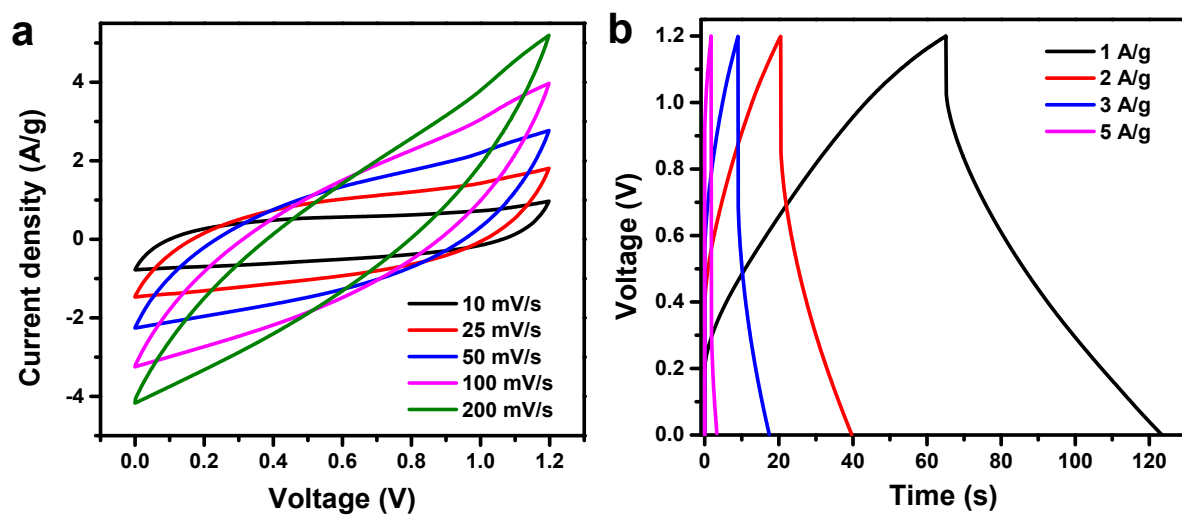

**Fig. S3.** (a) CV curves at different scan rates and (b) GCD curves at different current densities of the CNF/Eu<sub>2</sub>O<sub>3</sub>-2.

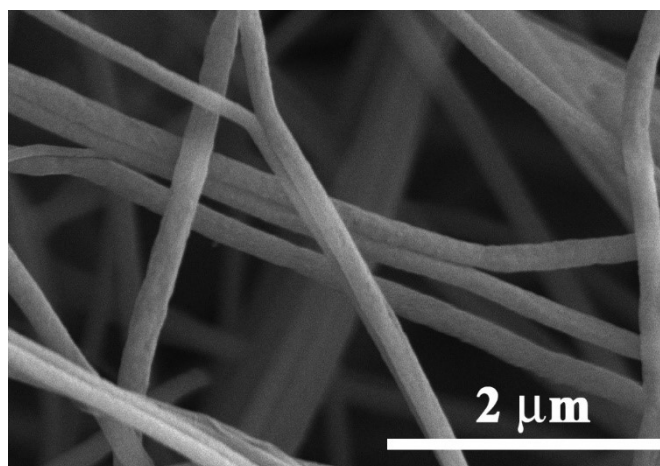

**Fig. S4.** SEM analysis was performed after 10 000 GCD cycles of CNF/Eu<sub>2</sub>O<sub>3</sub>-1.
